# Supplementary material for: Spatio–Temporal Heterogeneity of Urban Expansion and Population Growth in China
Source: MDPI journal article supplement (doi:10.3390/ijerph182413031), 2021-12-10
Supplement: s1 [file s1]

**Table S1.** The temporal dynamics of gross product of primary industry in China.

| Province       | Primary Industry (100 Million Yuan) |          |          |          |          |          |          | Change Rate<br>(100 Million<br>Yuan)/yr |
|----------------|-------------------------------------|----------|----------|----------|----------|----------|----------|-----------------------------------------|
|                | 1990                                | 1995     | 2000     | 2005     | 2010     | 2015     | 2018     |                                         |
| Beijing        | 43.70                               | 72.20    | 79.30    | 86.90    | 122.80   | 140.40   | 118.70   | 3.07                                    |
| Tianjin        | 27.32                               | 60.80    | 73.69    | 112.38   | 131.71   | 162.31   | 172.71   | 5.21                                    |
| Hebei          | 90.22                               | 709.39   | 937.80   | 1473.62  | 2576.39  | 3446.53  | 3206.32  | 123.48                                  |
| Shanxi         | 221.06                              | 308.33   | 328.78   | 486.44   | 1012.78  | 1429.81  | 849.86   | 36.82                                   |
| Inner Mongoria | 111.14                              | 240.22   | 347.23   | 589.56   | 1134.63  | 1682.00  | 1735.33  | 63.59                                   |
| Liaoning       | 165.19                              | 395.03   | 497.73   | 876.30   | 1667.31  | 2417.13  | 2033.30  | 81.32                                   |
| Jilin          | 280.55                              | 535.97   | 691.72   | 1174.37  | 1993.22  | 2950.91  | 2175.66  | 89.42                                   |
| Heilongjiang   | 118.24                              | 318.84   | 589.93   | 942.01   | 1768.58  | 3027.22  | 2909.48  | 111.58                                  |
| Shanghai       | 34.24                               | 59.82    | 76.68    | 90.26    | 117.79   | 125.53   | 104.37   | 2.92                                    |
| Jiangsu        | 491.48                              | 990.69   | 984.39   | 1362.66  | 2386.05  | 3550.76  | 4128.52  | 128.81                                  |
| Zhejiang       | 224.60                              | 573.52   | 687.10   | 887.13   | 1360.20  | 1820.44  | 1909.92  | 61.28                                   |
| Anhui          | 356.81                              | 937.66   | 651.31   | 918.50   | 1284.38  | 1582.85  | 2602.44  | 62.91                                   |
| Fujian         | 123.66                              | 446.65   | 640.58   | 856.78   | 1373.82  | 2118.09  | 2379.82  | 80.40                                   |
| Jiangxi        | 174.11                              | 383.06   | 456.28   | 692.25   | 1161.24  | 1691.02  | 2105.36  | 67.24                                   |
| Shandong       | 1256.28                             | 1087.64  | 1420.03  | 2034.19  | 3349.37  | 4542.78  | 4948.87  | 147.67                                  |
| Henan          | 340.07                              | 788.74   | 1145.92  | 1892.35  | 3187.81  | 4227.32  | 4209.32  | 153.44                                  |
| Hubei          | 261.94                              | 783.74   | 843.09   | 1070.76  | 2013.05  | 3358.50  | 3547.52  | 119.95                                  |
| Hunan          | 236.38                              | 666.25   | 876.88   | 1248.76  | 2113.15  | 3287.25  | 3153.40  | 113.69                                  |
| Guangdong      | 390.07                              | 934.97   | 1274.07  | 1518.30  | 2308.50  | 3386.82  | 3831.45  | 120.52                                  |
| Guangxi        | 201.84                              | 325.44   | 599.82   | 961.81   | 1663.22  | 2577.75  | 3000.92  | 103.34                                  |
| Hainan         | 45.71                               | 128.90   | 192.00   | 295.86   | 526.89   | 854.72   | 1000.11  | 34.38                                   |
| Chongqing      | 100.40                              | 264.19   | 284.87   | 463.40   | 659.10   | 1067.72  | 1378.27  | 42.78                                   |
| Sichuan        | 486.05                              | 944.25   | 952.24   | 1483.42  | 2470.88  | 3675.28  | 4208.23  | 134.25                                  |
| Guizhou        | 261.93                              | 270.10   | 389.66   | 441.84   | 676.62   | 1704.31  | 2159.63  | 64.67                                   |
| Yunnan         | 222.14                              | 310.04   | 425.46   | 664.52   | 1170.17  | 2130.64  | 2483.60  | 82.37                                   |
| Tibet          | 14.10                               | 23.48    | 36.39    | 48.04    | 68.72    | 98.04    | 130.25   | 3.90                                    |
| Shaanxi        | 68.59                               | 172.00   | 267.67   | 431.96   | 989.53   | 1584.70  | 1821.09  | 65.13                                   |
| Gansu          | 120.73                              | 128.86   | 196.93   | 312.51   | 556.05   | 895.17   | 875.04   | 30.94                                   |
| Qinghai        | 53.52                               | 55.54    | 60.12    | 63.52    | 134.92   | 216.80   | 264.95   | 7.57                                    |
| Ningxia        | 16.59                               | 9.97     | 13.10    | 24.58    | 53.48    | 237.78   | 280.84   | 9.42                                    |
| Xinjiang       | 94.62                               | 240.71   | 288.18   | 510.00   | 1038.43  | 1409.66  | 1692.09  | 58.32                                   |
| Total          | 8703.80                             | 15379.22 | 18560.74 | 26481.95 | 44050.49 | 64726.87 | 68997.22 | 2265.79                                 |

**Table S2.** The temporal dynamics of gross product of secondary industry in China.

| Province       | Secondary Industry (100 Million Yuan) |          |          |           |           |           |           | Change Rate<br>(100 Million<br>Yuan)/yr |
|----------------|---------------------------------------|----------|----------|-----------|-----------|-----------|-----------|-----------------------------------------|
|                | 1990                                  | 1995     | 2000     | 2005      | 2010      | 2015      | 2018      |                                         |
| Beijing        | 262.00                                | 643.60   | 1040.60  | 2045.60   | 3387.90   | 4660.60   | 5647.70   | 196.53                                  |
| Tianjin        | 181.38                                | 518.55   | 863.83   | 2165.83   | 4937.50   | 7918.10   | 7609.81   | 306.92                                  |
| Hebei          | 244.72                                | 1226.05  | 2554.94  | 5297.70   | 10736.21  | 14533.60  | 14849.08  | 586.66                                  |
| Shanxi         | 952.19                                | 2021.17  | 2749.45  | 7137.96   | 15588.63  | 19458.69  | 7519.73   | 525.13                                  |
| Inner Mongoria | 100.09                                | 292.59   | 576.63   | 1786.82   | 6852.27   | 9852.90   | 6571.61   | 339.35                                  |
| Liaoning       | 540.84                                | 1488.65  | 2256.12  | 4248.66   | 10933.36  | 13051.47  | 10510.40  | 465.99                                  |
| Jilin          | 442.51                                | 795.47   | 1373.64  | 2963.12   | 8397.71   | 13085.27  | 11884.96  | 492.69                                  |
| Heilongjiang   | 321.48                                | 789.46   | 1767.97  | 2481.46   | 5560.51   | 5694.49   | 5133.11   | 211.58                                  |
| Shanghai       | 505.60                                | 1430.47  | 2231.93  | 4451.11   | 7376.81   | 8259.03   | 9732.54   | 346.05                                  |
| Jiangsu        | 954.58                                | 2970.05  | 4133.31  | 10400.48  | 22117.60  | 33648.01  | 42670.35  | 1508.32                                 |
| Zhejiang       | 408.49                                | 2057.58  | 3716.80  | 7237.49   | 14097.97  | 19759.59  | 31278.39  | 1013.11                                 |
| Anhui          | 459.59                                | 1275.44  | 1057.12  | 2166.58   | 1836.39   | 6461.96   | 14304.85  | 377.21                                  |
| Fujian         | 160.75                                | 931.23   | 1924.64  | 3194.90   | 7330.35   | 13060.97  | 17267.12  | 595.13                                  |
| Jiangxi        | 127.89                                | 433.62   | 736.61   | 1858.61   | 5107.82   | 8775.89   | 11316.37  | 401.87                                  |
| Shandong       | 2375.97                               | 2441.92  | 4223.86  | 10971.97  | 21945.15  | 30446.04  | 35730.54  | 1287.48                                 |
| Henan          | 394.67                                | 1443.29  | 2340.23  | 5578.50   | 13349.39  | 18503.69  | 22479.88  | 824.15                                  |
| Hubei          | 370.02                                | 1178.44  | 1924.32  | 2777.50   | 7533.52   | 15351.82  | 19208.03  | 664.79                                  |
| Hunan          | 266.97                                | 805.56   | 1352.81  | 2649.84   | 8113.10   | 14589.47  | 14999.84  | 582.59                                  |
| Guangdong      | 594.77                                | 2746.28  | 4937.00  | 11271.71  | 23096.53  | 34471.63  | 41526.27  | 1512.01                                 |
| Guangxi        | 210.62                                | 433.75   | 604.26   | 1536.07   | 4504.53   | 7732.44   | 8100.28   | 312.76                                  |
| Hainan         | 20.19                                 | 78.48    | 103.97   | 240.83    | 546.05    | 875.82    | 1095.79   | 38.81                                   |
| Chongqing      | 135.62                                | 492.67   | 760.03   | 1577.66   | 3574.06   | 7195.00   | 8328.79   | 300.95                                  |
| Sichuan        | 443.46                                | 1059.05  | 1675.01  | 3172.49   | 8854.04   | 16361.53  | 18606.71  | 681.49                                  |
| Guizhou        | 293.32                                | 319.50   | 522.65   | 832.60    | 1909.15   | 4522.35   | 5876.85   | 194.33                                  |
| Yunnan         | 244.73                                | 545.88   | 857.29   | 1495.10   | 3387.87   | 5574.58   | 7104.72   | 244.19                                  |
| Tibet          | 3.57                                  | 13.24    | 27.05    | 63.52     | 163.92    | 376.28    | 628.37    | 19.88                                   |
| Shaanxi        | 144.35                                | 363.91   | 757.80   | 1872.42   | 5394.99   | 8795.62   | 11710.80  | 413.22                                  |
| Gansu          | 183.71                                | 269.13   | 424.99   | 855.31    | 1964.31   | 2488.94   | 2788.61   | 102.51                                  |
| Qinghai        | 172.52                                | 191.30   | 202.09   | 270.37    | 768.87    | 1208.99   | 1235.19   | 42.95                                   |
| Ningxia        | 24.88                                 | 44.47    | 73.21    | 172.37    | 420.74    | 1514.35   | 1796.43   | 63.06                                   |
| Xinjiang       | 83.50                                 | 283.97   | 537.58   | 1164.80   | 2592.15   | 3616.94   | 4922.97   | 171.15                                  |
| Total          | 13694.91                              | 31850.51 | 50818.25 | 107045.67 | 236817.64 | 357101.72 | 408748.70 | 14975.11                                |

**Table S3.** The temporal dynamics of gross product of tertiary industry in China.

| Province       | Tertiary Industry (100 Million Yuan) |          |          |          |           |           |           | Change Rate<br>(100 Million<br>Yuan)/yr |
|----------------|--------------------------------------|----------|----------|----------|-----------|-----------|-----------|-----------------------------------------|
|                | 1990                                 | 1995     | 2000     | 2005     | 2010      | 2015      | 2018      |                                         |
| Beijing        | 195.10                               | 791.90   | 2092.90  | 5008.90  | 10930.90  | 18884.70  | 24553.60  | 869.15                                  |
| Tianjin        | 102.25                               | 352.62   | 764.36   | 1669.73  | 4274.56   | 8714.26   | 11027.12  | 389.59                                  |
| Hebei          | 134.84                               | 878.50   | 1861.06  | 3492.39  | 7303.89   | 12460.89  | 16832.72  | 578.33                                  |
| Shanxi         | 321.68                               | 783.96   | 1372.21  | 3053.83  | 7633.18   | 13275.33  | 8390.39   | 420.28                                  |
| Inner Mongoria | 71.40                                | 236.42   | 493.83   | 1738.73  | 4899.31   | 9024.42   | 8577.86   | 353.58                                  |
| Liaoning       | 260.23                               | 1111.66  | 1892.43  | 3640.65  | 8050.15   | 13206.43  | 13189.13  | 514.60                                  |
| Jilin          | 290.93                               | 610.08   | 1226.34  | 2583.14  | 5937.78   | 10382.45  | 13680.95  | 473.54                                  |
| Heilongjiang   | 151.26                               | 498.28   | 1156.40  | 1977.70  | 4066.27   | 6932.98   | 8563.83   | 302.49                                  |
| Shanghai       | 241.82                               | 1027.79  | 2503.54  | 4824.17  | 9942.25   | 17274.62  | 22842.96  | 792.24                                  |
| Jiangsu        | 490.17                               | 1780.01  | 3050.86  | 13556.33 | 39472.40  | 34737.46  | 47379.70  | 1803.46                                 |
| Zhejiang       | 205.15                               | 1135.02  | 2315.39  | 5345.62  | 11400.88  | 21458.35  | 29950.83  | 1018.70                                 |
| Anhui          | 303.90                               | 942.58   | 918.53   | 2001.28  | 1965.59   | 3986.91   | 13717.11  | 336.09                                  |
| Fujian         | 114.58                               | 746.38   | 1584.02  | 2516.03  | 5758.57   | 10744.03  | 16141.63  | 527.98                                  |
| Jiangxi        | 99.99                                | 344.56   | 675.31   | 1433.42  | 3162.43   | 6385.62   | 8581.56   | 293.45                                  |
| Shandong       | 1474.99                              | 1577.68  | 2938.61  | 6109.72  | 14889.70  | 28083.70  | 37192.19  | 1262.85                                 |
| Henan          | 239.44                               | 853.89   | 1600.70  | 3152.70  | 6703.68   | 14522.21  | 21678.41  | 706.15                                  |
| Hubei          | 264.20                               | 842.04   | 1558.39  | 2712.77  | 6243.85   | 12348.21  | 18104.54  | 593.55                                  |
| Hunan          | 166.79                               | 703.68   | 1416.14  | 2706.21  | 6129.43   | 12550.16  | 19470.56  | 629.40                                  |
| Guangdong      | 494.13                               | 2209.77  | 4385.57  | 10182.58 | 22308.30  | 40826.06  | 55689.20  | 1913.51                                 |
| Guangxi        | 213.47                               | 425.60   | 727.92   | 1494.69  | 3395.25   | 6495.57   | 9276.81   | 307.30                                  |
| Hainan         | 36.52                                | 155.87   | 230.85   | 382.06   | 991.56    | 1972.22   | 2736.15   | 91.46                                   |
| Chongqing      | 91.73                                | 366.20   | 746.10   | 1445.16  | 3724.33   | 7527.08   | 10656.13  | 358.50                                  |
| Sichuan        | 326.73                               | 872.94   | 1512.67  | 2854.74  | 6118.18   | 12008.04  | 19089.20  | 605.91                                  |
| Guizhou        | 279.00                               | 329.85   | 462.21   | 764.00   | 2034.45   | 8020.88   | 12053.36  | 379.41                                  |
| Yunnan         | 181.06                               | 370.99   | 725.77   | 1333.00  | 2845.40   | 6160.36   | 8173.45   | 276.15                                  |
| Tibet          | 10.03                                | 19.39    | 54.37    | 137.24   | 274.82    | 553.11    | 719.01    | 25.09                                   |
| Shaanxi        | 114.34                               | 334.23   | 736.54   | 1576.76  | 3685.84   | 7222.33   | 10393.20  | 347.98                                  |
| Gansu          | 148.71                               | 208.98   | 424.99   | 769.50   | 1521.79   | 3364.13   | 4520.53   | 150.29                                  |
| Qinghai        | 97.37                                | 97.37    | 132.35   | 206.22   | 483.68    | 934.10    | 1288.09   | 40.93                                   |
| Ningxia        | 17.34                                | 34.71    | 60.64    | 184.56   | 461.45    | 1164.13   | 1670.85   | 55.62                                   |
| Xinjiang       | 95.89                                | 290.17   | 537.80   | 929.34   | 1766.69   | 4208.97   | 5584.02   | 187.00                                  |
| Total          | 9310.90                              | 23198.89 | 42642.22 | 92580.28 | 211878.42 | 361100.58 | 488608.10 | 16767.48                                |
